# Supplementary material for: Peroxynitrite scavenger FeTPPS binds with hCT to effectively inhibit its amyloid aggregation
Source: Royal Society of Chemistry journal article supplement (doi:10.1039/d4dt02214a), 2024-01-01
Supplement: d4dt02214a1.pdf [file d4dt02214a1.pdf]

Electronic Supplementary Information (ESI)

**Peroxynitrite scavenger FeTPPS bind with hCT to effectively inhibit its amyloid aggregation**

Bin Xiao,<sup>a</sup> Junhao Xiao,<sup>a</sup> Sisi Liu,<sup>a</sup> Xiaoying Xiao,<sup>a</sup> Shengping Dai,<sup>a</sup> Yan Sui,<sup>a</sup> Jinming Wu<sup>b</sup> and Huixian Ye<sup>\*a</sup>

*a.School of Chemistry and Chemical Engineering, Key Laboratory of Jiangxi Province for Special Optoelectronic Artificial Crystal Materials, Jinggangshan University, Ji'an, Jiangxi 343009, P. R. China.*

*b.Department of Experimental Medical Science, Faculty of Medicine, Lund University, 22100, Lund, Sweden.*

**Contents**

- 1. Figure S1** (A) 3D structure of template: 7TYH; (B) The structure model of hCT generated by homology modeling using template: 7TYH; (C) The superposition of template with hCT model. pS2
- 2. Figure S2** The Ramachandran plot of hCT model. pS2
- 3. Figure S3** (A) The original time-dependent CD spectra for hCT (20  $\mu$ M) without or in presence of porphyrin (10  $\mu$ M) during 12 h; (B) The original spectra of hCT along the smoothed one. pS3

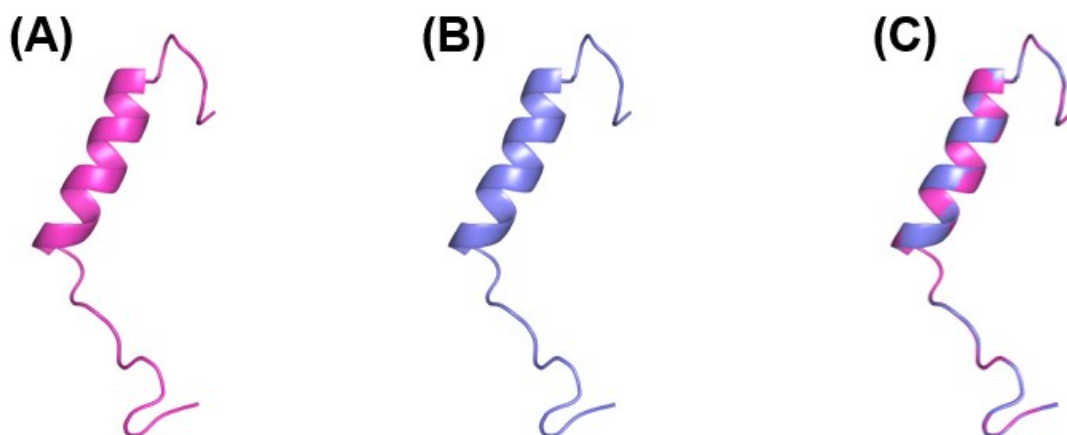

**Figure S1.** (A) 3D structure of template: 7TYH; (B) The structure model of hCT generated by homology modeling using template: 7TYH; (C) The superposition of template with hCT model.

**Procedure for model construction:**

The structure model of hCT was constructed on the Swiss-Model online server (<https://swissmodel.expasy.org/>). The templates search was firstly carried out according to the sequence of hCT (CGNLSTCMLGTYTQDFNKFHTFPQTAIGVGAP, disulfide bond: Cys1-Cys7). Among these search results, the template:7TYH with the largest GMQE value (0.8) and the 100% sequence identity, presenting the high quality of the model prediction, was chose for model construction. Then, the model of hCT was built based on the template.

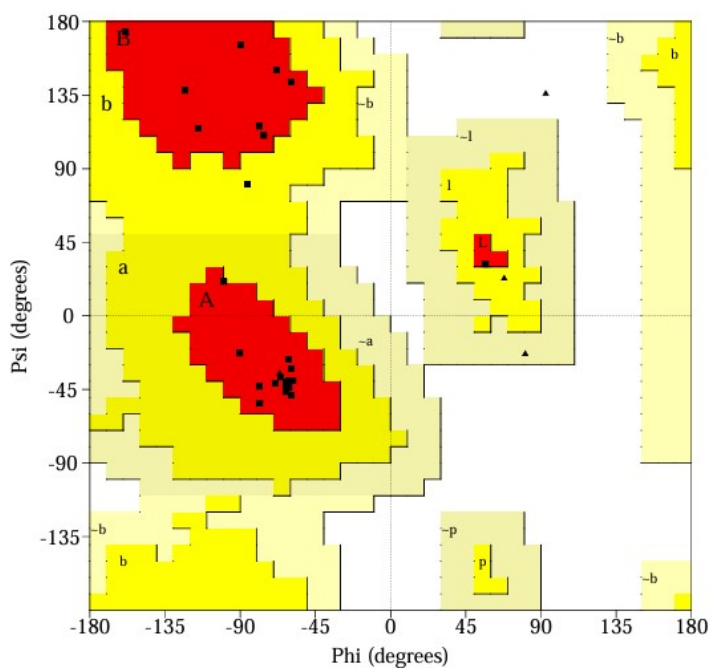

**Figure S2.** The Ramachandran plot of hCT model.

**Evaluation for model construction:**

The obtained structure model of hCT was evaluated using SAVES v6.0 (<https://servicesn.mbi.ucla.edu/SAVES/>). As shown in **Figure S2**, the number of residues within the reliable range (Residues in most favoured regions [A, B, L]) is 23, accounting for 92.0% of the total sequence, and two residues locate in the allowed range (Residues in additional allowed regions [a, b, l, p]), accounting for 8% of the total sequence. The residues within the reliable and allowed ranges account for 100% in total. This result suggests that the structure model of hCT generated by homology modeling is reasonable and credible.

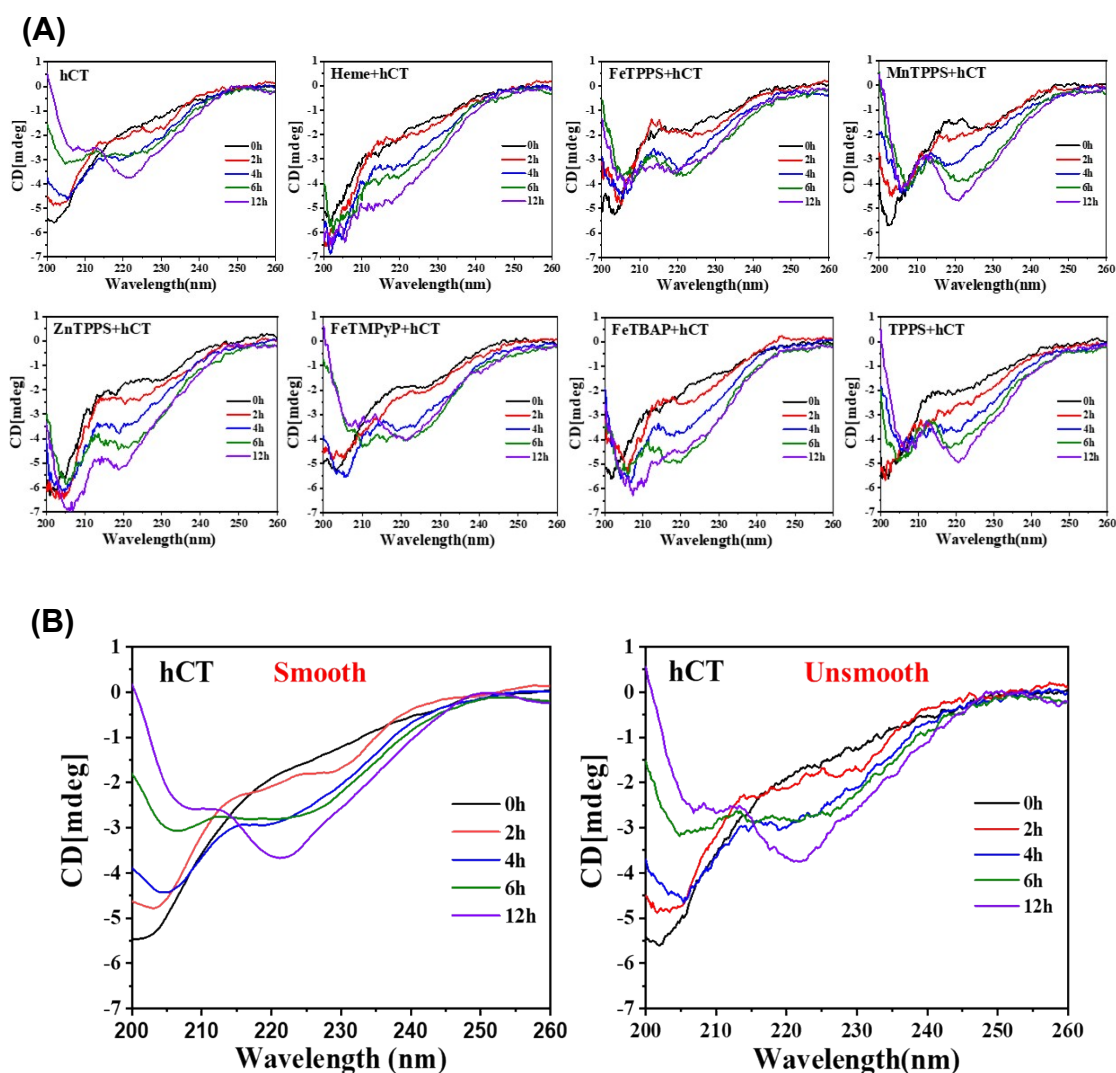

**Figure S3.** (A) The original time-dependent CD spectra for hCT (20  $\mu$ M) without or in presence of porphyrin (10  $\mu$ M) during 12 h; (B) The original spectra of hCT along with the smoothed one.
